# Supplementary material for: Metabolomics Reveals Distinct Metabolites between Lonicera japonica and Lonicera macranthoides Based on GC-MS
Source: Hindawi journal article supplement (doi:10.1155/2020/6738571), 2020-09-21
Supplement: f1 [file 6738571.f1.docx]

**Fig.S1** 6 different chemical classes of the 63 metabolites
